# Supplementary material for: Outcomes of Cryoballoon Ablation in High- and Low-Volume Atrial Fibrillation Ablation Centres: A Russian Pilot Survey
Source: Hindawi journal article supplement (doi:10.1155/2015/591603), 2015-01-01
Supplement: f1 [file 591603.f1.pdf]

**SUPPLEMENTARY TABLE 1**

**General cryoballoon ablation questionnaire (translated from Russian)**

| GENERAL QUESTIONS REGARDING CENTRE EXPERIENCE IN CATHETER ABLATION                   |  |                                                                                                       |  |                                                                                                          |  |                                                                                      |  |                                                          |  |
|--------------------------------------------------------------------------------------|--|-------------------------------------------------------------------------------------------------------|--|----------------------------------------------------------------------------------------------------------|--|--------------------------------------------------------------------------------------|--|----------------------------------------------------------|--|
| <sup>1</sup> When your centre started tachyarrhythmia ablation?                      |  | <sup>2</sup> When your centre started AF ablation?                                                    |  | <sup>3</sup> Total number of all arrhythmia catheter ablations performed in your centre (before 10.2014) |  | <sup>4</sup> Total number of AF (RF+cryo) performed in your centre (before 10.2014)? |  |                                                          |  |
|                                                                                      |  |                                                                                                       |  |                                                                                                          |  |                                                                                      |  |                                                          |  |
| <sup>5</sup> Total number of AF ablations (RF+cryo) performed in your centre in 2013 |  | <sup>6</sup> Total number of AF ablations (RF+cryo) performed in your centre in 2014 (before 10.2014) |  | <sup>7</sup> When your centre started CBA?                                                               |  |                                                                                      |  |                                                          |  |
| QUESTIONS REGARDING CRYOBALLOON ABLATION EXPERIENCE                                  |  |                                                                                                       |  |                                                                                                          |  |                                                                                      |  |                                                          |  |
| <sup>8</sup> Number of CBAs performed in your centre                                 |  | <sup>9</sup> Of them for paroxysmal AF                                                                |  | <sup>10</sup> Of them for persistent AF                                                                  |  | <sup>11</sup> N of males                                                             |  | <sup>12</sup> Mean age                                   |  |
|                                                                                      |  |                                                                                                       |  |                                                                                                          |  |                                                                                      |  |                                                          |  |
| <sup>13</sup> Number of CBAs performed in 2013                                       |  | <sup>14</sup> Number of CBAs performed in 2013 (before 10.2014)?                                      |  | <sup>15</sup> Number of operators performing CBA                                                         |  |                                                                                      |  |                                                          |  |
| CRYOBALLOON ABLATION PARAMETERS                                                      |  |                                                                                                       |  |                                                                                                          |  |                                                                                      |  |                                                          |  |
| <sup>16</sup> Do you use Arctic Front balloons (yes\no)?                             |  | <sup>17</sup> Do you use 23 mm balloons (yes\no + %)?                                                 |  | <sup>18</sup> Do you use 28 mm balloons (yes\no +%)?                                                     |  | <sup>19</sup> Do you use the Achieve catheter? (yes\no)                              |  | <sup>20</sup> Do you use the Advance balloon (yes\no +%) |  |
|                                                                                      |  |                                                                                                       |  |                                                                                                          |  |                                                                                      |  |                                                          |  |
| <sup>21</sup> Number of transseptal punctures (with/without Achieve)                 |  | <sup>22</sup> Do you use other circular diagnostic catheter (with/without Achieve)?                   |  | <sup>23</sup> Do you use ultrasound guidance (routinely/only sometimes)?                                 |  | <sup>24</sup> TEE (yes\no)?                                                          |  | <sup>25</sup> ICE (yes\no)                               |  |

|                                                                                    |  |                                                                                 |  |                                           |  |                                                                   |  |                                                                                                                |   |
|------------------------------------------------------------------------------------|--|---------------------------------------------------------------------------------|--|-------------------------------------------|--|-------------------------------------------------------------------|--|----------------------------------------------------------------------------------------------------------------|---|
| <sup>26</sup> Ultrasound only for transeptal access (NA\yes\no)                    |  | <sup>27</sup> Ultrasound for balloon positioning as well (+doppler) (NA\yes\no) |  | <sup>28</sup> Mean fluoro time            |  | <sup>29</sup> Mean fluoro time with Achieve/without Achieve (min) |  | <sup>30</sup> Mean fluoro time with Advance (min)                                                              |   |
| <sup>31</sup> Mean fluoro time for first 20 procedures                             |  | <sup>32</sup> First 20-50 procedures                                            |  | <sup>33</sup> Mean procedure time (min)   |  | <sup>34</sup> Procedure time without Achieve (min)                |  | <sup>35</sup> Procedure time with Achieve (min)                                                                |   |
| <sup>36</sup> Procedure time with Advance (min)                                    |  | <sup>37</sup> Mean procedure time for first 20 procedures                       |  | <sup>38</sup> First 20-50 procedures      |  |                                                                   |  |                                                                                                                |   |
| <sup>39</sup> Additional touch-up applications for PV isolation (Arctic Front) (%) |  | <sup>40</sup> Additional touch-up applications for PV isolation (Advance) (%)   |  | <sup>41</sup> Touch-ups using RF (yes\no) |  | <sup>42</sup> Touch-ups using cryo (yes\no)                       |  | <sup>43</sup> RF ablation for additional linear lesions during the same procedure (except typical flutter) (%) | 0 |

| FOLLOW-UP (please consider a 3-month blanking period)                                      |  |                                                                              |  |                                                                  |  |                                                    |  |                                                                    |  |
|--------------------------------------------------------------------------------------------|--|------------------------------------------------------------------------------|--|------------------------------------------------------------------|--|----------------------------------------------------|--|--------------------------------------------------------------------|--|
| <sup>44</sup> Duration of hospital stay (days)                                             |  | <sup>45</sup> Do you routinely perform patient follow-up after CBA? (yes\no) |  | <sup>46</sup> 24-hour Holter how frequently?                     |  | <sup>47</sup> 48-72-hour Holter how frequently?    |  | <sup>48</sup> Implantable loop recorder? (% of patients after CBA) |  |
|                                                                                            |  |                                                                              |  |                                                                  |  |                                                    |  |                                                                    |  |
| <sup>49</sup> Rest ECG how frequently?                                                     |  | <sup>50</sup> Phone contact how frequently?                                  |  | <sup>51</sup> Patients visit an outpatient unit? How frequently? |  |                                                    |  |                                                                    |  |
| PERIPROCEDURAL ANTICOAGULATION (CBA only)                                                  |  |                                                                              |  |                                                                  |  |                                                    |  |                                                                    |  |
| <sup>52</sup> Bridge anticoagulation routinely (yes/no)?                                   |  | <sup>53</sup> Uninterrupted Warfarin (yes\no)?                               |  | <sup>54</sup> Non-vitamin K oral anticoagulants (NOACs)?         |  | <sup>55</sup> Dabigatran – hours of skip (if used) |  | <sup>56</sup> Rivaroxaban - hours of skip (if used)                |  |
| <sup>57</sup> Apixaban – hours of skip (if used)                                           |  |                                                                              |  |                                                                  |  |                                                    |  |                                                                    |  |
| ARRHYTHMIA-FREE RATE AFTER CBA at 6/12 months – OFF AADs (no recurrence registered on ECG) |  |                                                                              |  |                                                                  |  |                                                    |  |                                                                    |  |
| <sup>58</sup> Paroxysmal AF? (6/12 months, %)                                              |  | <sup>59</sup> Persistent AF? (6/12 months, %)                                |  | <sup>60</sup> Long-standing persistent AF? (6/12 months, %)      |  |                                                    |  |                                                                    |  |

[illegible]

**SUPPLEMENTARY TABLE 2**

**Additional questionnaire regarding procedure-related adverse events (translated form Russian)**

| Tamponade                               |                                         |  |                |  |                                           |        |            |  |
|-----------------------------------------|-----------------------------------------|--|----------------|--|-------------------------------------------|--------|------------|--|
|                                         |                                         |  |                |  |                                           | Gender | Age, years |  |
| Patient-1                               | Possible reason and management          |  |                |  |                                           |        |            |  |
| Patient-2                               | Possible reason and management          |  |                |  |                                           |        |            |  |
| <i>Please add more rows if required</i> |                                         |  |                |  |                                           |        |            |  |
| Vascular adverse events                 |                                         |  |                |  |                                           |        |            |  |
| <b>Arteriovenous fistula</b>            | Patient-1 - management                  |  |                |  |                                           |        |            |  |
|                                         | Patient-2 – management                  |  |                |  |                                           |        |            |  |
|                                         | <i>Please add more rows if required</i> |  |                |  |                                           |        |            |  |
| <b>Pulsating hematoma</b>               | Patient-1 – management                  |  |                |  |                                           |        |            |  |
|                                         | Patient-2 - management                  |  |                |  |                                           |        |            |  |
|                                         | <i>Please add more rows if required</i> |  |                |  |                                           |        |            |  |
| Phrenic nerve paresis                   |                                         |  |                |  |                                           |        |            |  |
| Patient-1                               | Transient? When recovered?              |  |                |  |                                           |        |            |  |
| Patient-2                               | Transient? When recovered?              |  |                |  |                                           |        |            |  |
| <i>Please add more rows if required</i> |                                         |  |                |  |                                           |        |            |  |
| Stroke                                  |                                         |  |                |  |                                           |        |            |  |
| Patient-1                               | Ischemic/Hemorrhagic                    |  | When occurred? |  | Information about management and recovery |        |            |  |
| Patient-2                               | Ischemic/Hemorrhagic                    |  | When occurred? |  | Information about management              |        |            |  |

|                                                                                                        |                          |  |                   |  |                                                        |  |  |  |
|--------------------------------------------------------------------------------------------------------|--------------------------|--|-------------------|--|--------------------------------------------------------|--|--|--|
|                                                                                                        |                          |  |                   |  | t and<br>recovery                                      |  |  |  |
| <i>Please add<br/>more rows if<br/>required</i>                                                        |                          |  |                   |  |                                                        |  |  |  |
| <b>Hemoptysis</b>                                                                                      |                          |  |                   |  |                                                        |  |  |  |
| Patient-1                                                                                              | Severe/mod<br>arate/mild |  | When<br>occurred? |  | Information<br>about<br>managemen<br>t and<br>recovery |  |  |  |
| <i>Please add<br/>more rows if<br/>required</i>                                                        |                          |  |                   |  |                                                        |  |  |  |
|                                                                                                        |                          |  |                   |  |                                                        |  |  |  |
| <i>Please add any other information regarding procedure-related adverse events not indicated above</i> |                          |  |                   |  |                                                        |  |  |  |
|                                                                                                        |                          |  |                   |  |                                                        |  |  |  |
